# Supplementary material
Source: publisher figshare collection journal article supplement (https://sage.figshare.com/ndownloader/files/18044543)
Supplement: Supplementary file 1 [file 18044543]

## Sheet: Studies
	Reference	Authors	Year	Title	Journal	Location	Continent	Economic classification (World Bank)
	Oldfield et al. (2016)	Thomas L. Oldfield, Eoin White, Nicholas M. Holden	2016	An environmental analysis of options for utilising wasted food and food residue	Journal of Environmental Management	Ireland	Europe	High Income
	Blengini (2008)	Gian Andrea Blengini	2008	Applying LCA to organic waste management in Piedmont, Italy	Organic Waste Management	Piedmont, Italy	Europe	High Income
	Aye & Widjaye (2006)	Lu Aye, E.R. Widjaya	2006	Environmental and economic analyses of waste disposal options for traditional markets in Indonesia	Waste Management	Indonsesia	Asia	Lower Middle Income
	Sonesson et al. (2000)	U. Sonesson , A. Bjorklund, M. Carlsson, M. Dalemo	2000	Environmental and economic analysis of management systems of biodegradable waste	Resources, Conservation and Recycling	Uppsala, Sweden	Europe	High Income
	Liu et al. (2017b)	Yili Liu, Peixuan Xing, Jianguo Liu	2017	Environmental performance evaluation of different municipal solid waste management scenarios in China	Resources, Conservation & Recycling	China	Asia	Upper Middle Income
	Borjesson & Berglund (2007)	Pa˚ Borjesson_x0002_, Maria Berglund	2007	Environmental systems analysis of biogas systems—Part II: The environmental impact of replacing various reference systems	Biomass and Bioenergy	Sweden	Europe	High Income
	Khoo et al. (2010)	Hsien H. Khoo, Teik Z. Lim, Reginald B.H. Tan	2010	Food waste conversion options in Singapore: Environmental impacts based on an LCA perspective	Science of the Total Environment	Singapore	Asia	High Income
	Zhao et al. (2009)	Wei Zhaoa, Ester van der Voet, Yufeng Zhang, Gjalt Huppes	2009	Life cycle assessment of municipal solid waste management with regard to greenhouse gas emissions: Case study of Tianjin, China	Science of the Total Environment	Tianjin, China	Asia	Upper Middle Income
	Sharma & Chandel (2017)	Bhupendra K Sharma and Munish K Chandel	2017	Life cycle assessment of potential municipal solid waste management strategies for Mumbai, India	Waste Management & Research	Mumbai, India	Asia	Lower Middle Income
	Mendes et al. (2003)	Mara Regina Mendes, Toshiya Aramaki, Keisuke Hanaki	2003	Assessment of the environmental impact of management measures of biodegradable fraction of MSW in Sao Paulo	Waste Management	São Paulo, Brazil	Latin America	Upper Middle Income
	Edwards et al. (2018)	Joel Edwards, Maazuza Othman, Enda Crossin, Stewart Burn	2018	Life cycle assessment to compare the environmental impact of seven contemporary food waste management systems	Bioresource Technology	Australia	Oceania	High Income
	Thyberg & Tonjes (2017)	Krista L. Thyberg, David J. Tonjes	2017	The environmental impacts of alternative food waste treatment technologies in the U.S.	Journal of Cleaner Production	New York, USA	North America	High Income
	Zhao & Deng (2014)	Yan Zhao, Wenjing Deng	2014	Environmental impacts of different food waste resource technologies and the effects of energy mix	Resources, Conservation and Recycling	Hong Kong	Asia	Upper Middle Income
	Takata et al. (2013)	Miki Takata, Kazuyo Fukushima, Minako Kawai, Norio Nagao, Chiaki Niwa, Teruaki Yoshida, Tatsuki Toda , Kazuyo Fukushima b , Minako Kawai a , Norio Nagao c , Chiaki Niwa a , Teruaki Yoshida d , Tatsuki Toda a,n	2013	The choice of biological waste treatment method for urban areas in Japan—An environmental perspective	Renewable and Sustainable Energy Reviews	Japan	Asia	High Income
	Levis & Barlaz (2011)	James W. Levis* and Morton A. Barlaz	2011	What Is the Most Environmentally Beneficial Way to Treat Commercial Food Waste?	Environmental Science & Technology	USA	North America	High Income
	Bernstad & La Cour Jansen (2011)	A. Bernstad, J. la Cour Jansen	2011	A life cycle approach to the management of household food waste – A Swedish full-scale case study	Waste Management	Malmo, Sweden	Europe	High Income
	Bovea et al. (2010)	M.D. Bovea *, V. Ibáñez-Forés, A. Gallardo, F.J. Colomer-Mendoza	2010	Environmental assessment of alternative municipal solid waste management strategies. A Spanish case study	Waste Management	Castellon de la Plana, Spain	Europe	High Income
	Lombardi et al. (2015)	L. Lombardi • E. A. Carnevale • A. Corti	2015	Comparison of different biological treatment scenarios for the organic fraction of municipal solid waste	International Journal of Environmental Science and Technology	Florença, Italy	Europe	High Income
	Cremiato et al. (2018)	Raffaele Cremiato a, Maria Laura Mastellone a, *, Carla Tagliaferri b, Lucio Zaccariello a, Paola Lettieri b	2017	Environmental impact of municipal solid waste management using Life Cycle Assessment: The effect of anaerobic digestion, materials recovery and secondary fuels production	Renewable Energy	Província de Caserta, Itály	Europe	High Income
	Kong et al. (2012)	Dung Kong, Jilei Shan, Mario Iacoboni and Stephen R Maguin	2012	Evaluating greenhouse gas impacts of organic waste management options using life cycle assessment	Waste Management & Research	Califórnia, USA	North America	High Income
	Yoshida et al. (2012)	Hiroko Yoshida∗, Joshua J. Gable, Jae K. Park	2012	Evaluation of organic waste diversion alternatives for greenhouse gas reduction	Resources, Conservation and Recycling	Madison, Wisconsin, USA	North America	High Income
	Ngnikam et al. (2002)	Emmanuel Ngnikam, Emile Tanawa, Patrick Rousseaux, Arthur Riedacker, Rémy Gourdon	2002	Evaluation of the potentialities to reduce greenhouse gases (GHG) emissions resulting from various treatments of municipal solid wastes (MSW) in moist tropical climates: Application to Yaounde	Waste Management & Research	Yaounde, Cameroon	Africa	Lower Middle Income
	Liu et al. (2017a)	Yili Liu, Weixin Sun, Jianguo Liu ⇑	2017	Greenhouse gas emissions from different municipal solid waste management scenarios in China: Based on carbon and energy flow analysis	Waste Management	China	Asia	Upper Middle Income
	Di Maria et al. (2016)	Francesco Di Maria a,b,⇑, Caterina Micale b, Stefano Contini a, Emanuela Morettini a	2016	Impact of biological treatments of bio-waste for nutrients, energy and bio-methane recovery in a life cycle perspective	Waste Management	Italy	Europe	High Income
	Dong et al. (2013)	Jun Dong & Mingjiang Ni & Yong Chi & Daoan Zou & Chao Fu	2013	Life cycle and economic assessment of source-separated MSW collection with regard to greenhouse gas emissions: a case study in China	Environmental Science and Pollution Research	Hangzhou, China	Asia	Upper Middle Income

## Sheet: Systematic Review
	Reference	Pre-collection	Collection and Transport	Pre-treatment	Treatment	Energy System			Agroecosystem			LCA Software	LCI	Impacts Assessed	Collection and Transport			Pre-treatment		Treatment							Separate emission from digestate storage	Agroecosystem				Energy Use Impact	Compensatory Energy System	Compensatory Agroecosystem
						Enegy System	Energy Use Impact	Compensatory Energy System	Agroecosystem	Use on Land	Compensatory Agroecosystem				Fuel	Distance to treatment	Digestate or Compost transportation	Assessed or not	Destination of rejects	Biogenic Carbon Dioxide (GWP = 0)	Composting - Emission of CH4 and N2O	Composting - Emission of NH3	Fugitive Emissions	Other stated emissions	Emission to water	Energy consumption		Carbon sequestration and storage on soils - Inclusion	Carbon sequestration and storage on soils - Observations	Use on Land - Direct Emissions	Use on Land - Indirect Emissions	Emission from biogas burning	Replaced energy matrix	N	P	K	Substituted Fertilizer	Peat substitution	Amount of replaced synthetic fertilizer and Mineral fertilizer equivalency factor	Use on Land - Direct Emissions	Use on Land - Indirect Emissions
	Oldfield et al. (2016)	0	1	1	1	1	0	1	1	1	1	GaBi v 6 software	EcoInvent	GWP, AP & EP	Diesel	100 km		1	1	1	1	0	0	H2S, VOC	n.i.	1	0	1	8% of applied carbon from compost (range from 2 to 14% for 100 year) - no potential to digestate	0	0	0	48.5% natural gas; 18.4% hard coal; 9.4% peat; 17.4% wind; 3.5% hydro; 0.5% waste; 0.7% biogas; 0.9% biomass; 0.8% fossil fuels	1	1	1	n.i.	0	Compost: 10% N ;75% P and 80% K; Digestate: 41/52% N ; 100% P and 100% K	0	0
	Blengini (2008)	1	1	1	1	1	1	1	1	1	1	SimaPro 7	Buwal 250, EcoInvent e I-LCA	GWP, AP, EP, ODP, POCP & GER	Diesel	25 to 40 km	-	1	1	0	n.i.	1	n.i.	VOCs	n.i.	1	0	1	173 kg of CO2 per ton of compost	0	0	1	Natural gas	1	1	1	n.i.	0	Compost: 1 ton of OFMSW becomes 261.3 kg of compost and replaces 8,44 kg of NPK / AD: 1 ton of OFMSW becomes 129 kg of digestate compost and replaces 3,86 kg NPK	0	0
	Aye & Widjaya (2006)	0	1	1	1	1	1	1	1	0	1	Simapro 5.1	Australian Database Library	GWP50, AP, EP & POF	n.i. (fossil)	30 km	40 km	1	1	0	n.i.	0	n.i.	Água	1	1	0	0	0	0	0	1	59% oil; 25% natural gas; 10% coal; 5% hydro and 1% geothermal	1	1	0	Urea and Triple Super Phosphate	0	1 ton of compost replace 8.75 kg of urea and 12.5 kg of triple super phosphate	0	0
	Sonesson et al. (2000)	0	1	1	1	1	1	1	1	1	1	ORWARE	ORWARE	GWP, AP, EP, PFP, FFD & P	Diesel	10 to 15 km	variable	1	0	1	1	data from ORWARE	data from ORWARE	n.i.	n.i.	1	0	0	0	1	0	1	Vehicle use	1	1	0	n.i.	0	n.i.	0	0
	Liu et al. (2017b)	0	0	1	1	1	n.i.	0	1	1	0	EaseTech	EaseTech	GWP	0	-	-	1	1	1	1	n.a.	1	n.i.	n.i.	1	0	1	Based on a theoretical degration rate of organic matter in compost and digestate	0	0	n.i.	0	0	0	0	-	0	0	0	0
	Borjesson & Berglund (2007)	0	1	0	1	1	1	1	1	1	1	-	-	GWP, AP, EP & POCP	Diesel & Gas	n.i.	n.i.	0	0	1	1	1	1	n.i.	n.i.	1	1	0	0	1	0	1	Fossil fuel	1	1	0	n.i.	0	It stablishes a relationship from compost and digestate to compare; Anaerobic digestion reduces the use of 1.6 to 3 kg of synthetic N per ton of OFMSW compared to composting, as mineral fertilizer equivalency for N if 70% to digestate and compost lower	0	0
	Khoo et al. (2010)	0	0	0	1	1	n.i.	0	1	0	1	-	EcoInvent	GWP, AP, EP, POP & EUEC	0	-	-	0	0	0	1	1	1	NOX, SOX e VOC	n.i.	1	0	0	0	0	0	n.i.	0	1	1	0	n.i.	0	0.0083 kg N and 0.002 kg P per kg of bio-compost; 0.0076 kg N and 0.0011 kg P per kg of digested matter in AD (based on Finvedden et al. (2000))	0	0
	Zhao et al. (2009)	0	1	0	1	1	n.i.	1	1	0	1	-	EcoInvent	GWP	Diesel	20 km to incineration of rejects; 30 km to composting and AD	-	0	0	1	1	n.a.	n.i.	n.i.	n.i.	1	0	0	0	0	0	n.i.	0	1	1	0	Ammonium nitrate and Diammonium phosphate	0	1:1 ratio based on Finvedden et al. (2000)	0	0
	Sharma & Chandel (2017)	0	1	1	1	1	1	1	1	0	1	-	GaBi v6.0	GWP, AP, EP & HumTox	Diesel	n.i.	-	1	1	1	1	1	1	SO2, NOX ,PM	n.i.	1	0	0	0	0	0	1	Coal based matrix - Provide emission factor based on GaBi v6.0 (2014)	1	1	1	n.i.	0	Based on nitrogen flow analysis that 32% of N entering composting stay in compost. No mentions to P and K.	0	0
	Mendes et al. (2003)	0	0	0	1	1	n.i.	1	1	0	1	-	White (1999) e Dalemo (1997)	GWP, AP & EP	0	0	-	0	0	n.i.	1	1	-	SO2, NO2, H2S, HF, HCL, NH3 NO2, NH3, Ntotal e Ptotal	n.i.	1	0	0	0	0	0	n.i.	95% hydro, 3% oil, 2% coal and 1% nuclear	1	0	0	Urea	0	n.i.	0	0
	Edwards et al. (2018)	0	1	1	1	1	1	1	1	1	1	SimaPro 8.0	Australasian Unit Process LCI and Ecoinvent	GWP, AP, EP,POF, HumTox, CCF & ARD	Diesel	n.i.	-	1	0	1	n.i.	n.i.	n.i.	n.i.	n.i.	1	0	1	1	1	0	1	New South Wales (76% black coal; 5% natural gas; 3% hydro; 0.6% wind; 1.5% solar; 12.8% imported and 1% other) and Victoria (89% brown coal; 1.25% natural gas; 5.8% hydro; 2% wind; 1.1% solar and 0.6% others)	1	1	1	n.i.	0	1:1 ratio based on nutrients (n.i.)	1	0
	Thyberg & Tonjes (2017)	0	1	0	1	1	1	1	1	1	1	EASETECH	EASETECH	GWP, TA, TE, FE, ME & DFR	n.i. (fossil)	11 km	38 km	0	0	0	n.i.	n.i.	n.i.	n.i.	n.i.	1	0	1	Based on Bruun et al. (2006) and Hansen et al. (2006)	0	0	1	81% natural gas, 8% coal e 11% oil	1	1	1	n.i.	0	Compost: 20% N ;100% P and 100% K; Digestate is composted	0	0
	Zhao & Deng (2014)	0	1	1	1	1	1	1	1	1	1	EASEWASTE	EASEWASTE and local data	GWP, AP, EP, ODP, POF, HumTox & EcoTox	Diesel	50 km to landfill and 30 km to composting and AD	50 km	1	0	0	1	1	0	PM10, CO, H2S, NOX, HCL and VOCs	n.i.	1	0	0	0	1	0	1	Energy mix in 2009: 54% coal; 23% nuclear e 23% natural gas; Planned energy mix for 2020: 50% nuclear; 40% natural gas and 10% coal	1	1	1	n.i.	0	n.i.	0	0
	Takata et al. (2013)	0	0	1	1	1	1	1	1	1	1	-	-	GWP	0	0	-	1	0	1	1	n.a.	0	n.i.	n.i.	1	0	0	0	1	0	1	29.8% nuclear, 23.5% coal, 22% natural gas, 14.7% oil, 8% hydro and 1.8% other renewables	1	1	0	n.i.	0	1:1 ratio based on Nitrogen and Phosphorous concentration in compost (1,5 to 3,9% N e 0,5 to 1,25% P) and digestate (4,16% N e 5,3% P)	1	0
	Levis & Barlaz (2011)	0	0	0	1	1	0	1	1	1	1	-	-	GWP, TEU, SOX & NOX	0	0	-	0	0	1	1	0	1	n.i.	n.i.	1	0	1	10 kg of C per ton of applied compost + 170 kg of C per ton of compost due to humus formation based on USEPA	0	0	0	72.5% coal and 27.5% natural gas	1	1	1	n.i.	1	Compost: 40% N ;100% P and 74% K; Digestate is composted	0	0
	Bernstad & La Cour Jansen (2011)	0	1	1	1	1	1	1	1	1	1	EASEWASTE	EASEWASTE and local data	GWP, AP, EP, ODP & POF	Diesel & Gas	21 km	Variable	1	0	0	1	1	1	n.i.	n.i.	1	0	0	0	1	0	1	30% replaces electricity from 50% hydro, 40% nuclear and 10% renewables; 70% replaces thermal energy for district heating from biomass and coal	1	1	1	n.i.	1	Compost: 30% N ;100% P and 100% K; Digestate: 70% N ;100% P and 100% K	0	0
	Bovea et al. (2010)	1	1	1	1	1	n.i.	1	1	0	1	SimaPro7	Local data	GWP, AP, EP, ODP & POP	Diesel	n.i.	-	1	0	n.i.	n.i.	n.i.	n.i.	n.i.	n.i.	1	0	0	0	0	0	n.i.	31.5% natural gas, 19.5% nuclear, 16.4% coal, 10.5% wind, 7.7% combined cycle, 8.4% hydro, 3.5% oil and 2.5% solar	1	1	1	n.i.	0	1 ton of compost replaces 7.1 kg N, 4.1 P2O5 and 5.4 kg de K2O	0	0
	Lombardi et al. (2015)	0	1	1	1	1	1	1	1	0	1	SimaPro	EcoInvent	GWP, AP, EP, HM, CARC, WS, SS, Pest, SW & PE	0* - Diesel	-	-	1	1	1	n.i.	n.i.	1	CO, PM and NOX	1	1	0	1	based com Hermann et al. (2011)	0	0	1	Italian energy mix in SimaPro: 46.4% natural gas, 13.84% hydro, 11.6% coal, 8.5% oil, 4% renewables, 1.2% waste and other for electricity; natural gas for thermal energy	0	0	0	n.i.	1	Replaces peat and straw (1 kg of compost replaces 0.186 kg of peat and 0.56 kg of straw)	0	0
	Cremiato et al. (2018)	1	1	1	1	1	1	1	1	0	1	GaBi 7	Local and diverse data	GWP, AP, EP, POCP & Dab	n.i. (fossil)	Travel 87 km to compostin	n.i.	1	1	n.i.	n.i.	n.i.	n.i.	n.i.	n.i.	1	0	n.i.	n.i.	0	0	1	Italian grid data - source not informed	0	0	0	n.i.	1	n.i.	0	0
	Kong et al. (2012)	0	1	1	1	1	0	1	1	1	1	LACSD	Data from review	GWP	Diesel	Travel 76 km to composting ; 100 km to AD	n.i.	1	1	1	1	0	0	n.i.	n.i.	1	0	1	direct 0.055 MgCE per Mg of compost and indirect 0.022 MgCE per Mg - direct 0.0165 MgCE per Mg of compost and indirect 0.0066 MgCE per Mg	0	0	0	32% coal, 31% natural gas, 24% large hydroelectric, 11% renewable (e.g. geothermal, solar, wind, biomass, etc.), and 3% nuclear	1	1	1	n.i.	1	Based on Boldrin et al. (2009, 2010)	0	0
	Yoshida et al. (2012)	0	1	1	1	1	0	1	1	1	1	EASEWASTE	Data from review	GWP	Diesel	n.i.	50 km	1	0	1	1	0	1	n.i.	n.i.	1	0	1	15% of C in compost and 9% of C in digestate and digestate compost	1	0	0	49% coal, 12% natural gas and oil, 1.7% renewable energy sources, and 37% purchased (emission factor of 0.920 kg CO2eq/kWh)	1	1	1	n.i.	0	Compost: 20% N ;100% P and 100% K; Digestate: 40% N ; 100% P and 100% K	0	0
	Ngnikam et al. (2002)	0	1	1	1	1	1	1	1	1	0	-	-	GWP	Gasolina	n.i.	70 km	1	0	1	0	0	0	n.i.	n.i.	1	0	1	54 kg C per ton of MSW for compost and 44 kg C per ton of MSW for digestate	0	0	1	Gasoline	0	0	0	-	0	0	0	0
	Liu et al. (2017a)	0	0	1	1	1	0	1	0	0	0	EASEWASTE	-	GWP & NER	0	-	-	1	1	1	1	0	1	n.i.	n.i.	1	0	0	Only for landfilling	0	0	0	Chines matrix base on Liu et al. (2010) - around 80% coal	0	0	0	-	0	0	0	0
	Di Maria et al. (2016)	0	0	1	1	1	1	1	1	0	1	SimaPro	Ecoinvent + secondary data	GWP, AP, EP, ODP, PM, POF, TE, FE & RD	0	-	-	1	0	1	1	1	1	n.i.	n.i.	1	0	0	0	0	0	1	Natural gas	1	1	1	n.i.	0	1:1 ratio based on nutrient concentrion in compost and digestate	0	0
	Dong et al. (2013)	0	1	0	1	1	0	1	1	0	1	-	-	GWP	Diesel	20 to 50 km	n.i.	0	0	1	1	0	1	CO	n.i.	1	0	0	0	0	0	0	75.9% coal, 3% oil, 2% natural gas, 17.6% hydropower and 1.5 % nuclear power	1	1	0	n.i.	0	8.3 kg N and 2.0 kg P per ton of compost and 7.6 kg N and 1.1 kg Pper ton of digestate based on Finvedenn et al. (2005)	0	0
